# Supplementary material for: Neighborhood Light at Night and Noise Levels, and Long-Term Sleep Trajectories in the Southern Community Cohort Study
Source: MDPI journal article supplement (doi:10.3390/clockssleep6020016), 2024-04-05
Supplement: s1 [file s1]

**Supplementary Table 1: Multinomial regression analysis of neighborhood LAN levels and sleep durations at baseline and follow-up**

| Characteristic | Baseline          |                   | Follow-up         |                   |
|----------------|-------------------|-------------------|-------------------|-------------------|
|                | Short sleep       | Long sleep        | Short sleep       | Long sleep        |
|                | OR                | OR                | OR                | OR                |
| <b>LAN</b>     | <b>BLACK</b>      |                   |                   |                   |
| Q1(Lowest)     | Ref               | Ref               | Ref               | Ref               |
| Q2             | 1.03 (0.94, 1.13) | 1.12 (0.99, 1.27) | 1.07 (0.98, 1.18) | 0.96 (0.85, 1.07) |
| Q3             | 1.08 (0.98, 1.18) | 1.12 (0.98, 1.27) | 1.11 (1.01, 1.23) | 1.05 (0.93, 1.18) |
| Q4             | 1.09 (0.99, 1.20) | 1.09 (0.95, 1.24) | 1.11 (1.00, 1.22) | 1.03 (0.91, 1.17) |
| Q5(Highest)    | 1.03 (0.93, 1.14) | 1.17 (1.01, 1.35) | 1.16 (1.05, 1.29) | 1.00 (0.88, 1.15) |
| <b>LAN</b>     | <b>WHITE</b>      |                   |                   |                   |
| Q1(Lowest)     | Ref               | Ref               | Ref               | Ref               |
| Q2             | 1.05 (0.96, 1.16) | 1.12 (0.97, 1.30) | 1.02 (0.92, 1.13) | 1.01 (0.89, 1.14) |
| Q3             | 1.02 (0.91, 1.14) | 1.09 (0.92, 1.30) | 0.98 (0.87, 1.11) | 1.10 (0.96, 1.27) |
| Q4             | 0.98 (0.86, 1.12) | 0.95 (0.77, 1.18) | 1.01 (0.88, 1.17) | 1.07 (0.90, 1.26) |
| Q5(Highest)    | 0.92 (0.80, 1.07) | 1.23 (0.98, 1.54) | 1.07 (0.91, 1.25) | 1.28 (1.07, 1.55) |
| <b>LAN</b>     | <b>TOTAL</b>      |                   |                   |                   |
| Q1(Lowest)     | Ref               | Ref               | Ref               | Ref               |
| Q2             | 1.04 (0.98, 1.11) | 1.14 (1.03, 1.25) | 1.06 (0.99, 1.13) | 0.99 (0.91, 1.07) |
| Q3             | 1.05 (0.98, 1.13) | 1.11 (1.00, 1.23) | 1.07 (0.99, 1.15) | 1.09 (0.99, 1.19) |
| Q4             | 1.04 (0.97, 1.12) | 1.06 (0.95, 1.18) | 1.06 (0.98, 1.15) | 1.07 (0.97, 1.17) |
| Q5(Highest)    | 0.98 (0.90, 1.06) | 1.16 (1.04, 1.31) | 1.11 (1.02, 1.21) | 1.08 (0.97, 1.20) |

Models were adjusted for race (total sample alone) age, sex, education, household income, metropolitan status of residence, and deprivation index. Ref=Reference category; OR = Odds Ratio

**Supplementary Table 2: Multinomial regression analysis of neighborhood noise levels and sleep durations at baseline and follow-up**

| Characteristic | Baseline          |                   | Follow-up         |                   |
|----------------|-------------------|-------------------|-------------------|-------------------|
|                | Short sleep       | Long sleep        | Short sleep       | Long sleep        |
|                | OR                | OR                | OR                | OR                |
| <b>NOISE</b>   |                   | <b>BLACK</b>      |                   |                   |
| Q1(Lowest)     | Ref               | Ref               | Ref               | Ref               |
| Q2             | 1.07 (0.98, 1.17) | 1.12 (0.99, 1.26) | 0.95 (0.87, 1.04) | 0.96 (0.85, 1.07) |
| Q3             | 1.10 (1.01, 1.20) | 1.13 (1.00, 1.28) | 1.02 (0.94, 1.12) | 1.00 (0.89, 1.12) |
| Q4             | 1.17 (1.07, 1.28) | 1.11 (0.98, 1.26) | 1.10 (1.00, 1.21) | 1.02 (0.91, 1.15) |
| Q5(Highest)    | 1.11 (1.01, 1.22) | 1.17 (1.03, 1.33) | 1.16 (1.06, 1.28) | 1.00 (0.89, 1.13) |
| <b>NOISE</b>   |                   | <b>WHITE</b>      |                   |                   |
| Q1(Lowest)     | Ref               | Ref               | Ref               | Ref               |
| Q2             | 1.02 (0.93, 1.12) | 1.00 (0.86, 1.16) | 1.02 (0.92, 1.12) | 1.10 (0.97, 1.24) |
| Q3             | 0.98 (0.88, 1.08) | 1.11 (0.94, 1.30) | 0.94 (0.84, 1.05) | 1.05 (0.92, 1.20) |
| Q4             | 1.07 (0.95, 1.20) | 1.03 (0.86, 1.24) | 1.01 (0.89, 1.14) | 1.04 (0.90, 1.21) |
| Q5(Highest)    | 1.02 (0.89, 1.17) | 1.13 (0.92, 1.39) | 1.01 (0.87, 1.17) | 1.18 (1.00, 1.40) |
| <b>NOISE</b>   |                   | <b>TOTAL</b>      |                   |                   |
| Q1(Lowest)     | Ref               | Ref               | Ref               | Ref               |
| Q2             | 1.04 (0.98, 1.11) | 1.07 (0.98, 1.18) | 0.98 (0.91, 1.04) | 1.03 (0.95, 1.11) |
| Q3             | 1.05 (0.98, 1.12) | 1.12 (1.01, 1.23) | 0.99 (0.93, 1.06) | 1.03 (0.95, 1.13) |
| Q4             | 1.13 (1.05, 1.21) | 1.08 (0.98, 1.20) | 1.08 (1.00, 1.16) | 1.06 (0.96, 1.15) |
| Q5(Highest)    | 1.05 (0.98, 1.14) | 1.14 (1.03, 1.27) | 1.11 (1.03, 1.20) | 1.06 (0.97, 1.17) |

Models were adjusted for race (total sample alone) age, sex, education, household income, metropolitan status of residence, and deprivation index. Ref=Reference category; OR = Odds Ratio
